# Supplementary material
Source: PubMed Central journal article supplement (PMC8760889)
Supplement: NIHMS604080-supplement-304262DR1_Acknowledgment_Permissions.pdf [file NIHMS604080-supplement-304262DR1_Acknowledgment_Permissions.pdf]

## Circulation Research

---

**From:** Fulton, David <DFULTON@gru.edu>  
**Sent:** Wednesday, May 28, 2014 4:05 PM  
**To:** circulation.research@circresearch.com  
**Cc:** Lewis Romer  
**Subject:** CIRCRES/2014/304262D.

This email indicates that I am aware and agree to be acknowledged in the CIRCRES/2014/304262D manuscript.

Regards,  
David

David Fulton  
Professor, Department of Pharmacology and Toxicology  
Director, Vascular Biology Center  
Medical College of Georgia  
Georgia Regents University  
Augusta, GA 30912  
Tel. 706 721 1946  
Fax 706 721 9799

## Circulation Research

---

**From:** Nagababu Enika <nenika1@jhmi.edu>  
**Sent:** Wednesday, May 28, 2014 1:47 PM  
**To:** circulation.research@circresearch.com  
**Cc:** Lewis Romer; deepeshrpandey@gmail.com; Dan Berkowitz  
**Subject:** circres/2014/304262D

This is inform you that I am giving a permission to authors for acknowledging my name ( Nagababu Enika) in the paper.

Thanks,

With regards  
Nagababu Enika  
*Assistant Professor*  
Dept. of Anesthesiology/Critical Care Medicine  
Johns Hopkins Medical Institutions  
720 Rutland Avenue, 1147 Ross Building  
Baltimore, MD 21287  
Office:410-614-4665 Cell:443-935-0571

## Circulation Research

---

**From:** Zongming Fu <zfu1@jhmi.edu>  
**Sent:** Wednesday, May 28, 2014 3:21 PM  
**To:** circulation.research@circresearch.com  
**Cc:** Lewis Romer  
**Subject:** CIRCRES/2014/304262D

Dear Editor,

This email is to give my permission to be acknowledged in the manuscript CIRCRES/2014/304262D .  
Zongming

Zongming Fu, Ph.D.

Assistant Professor

Department of Pediatrics, Division of Hematology

The Johns Hopkins University School of Medicine

Mason F Lord Center Tower 601,

5200 Eastern Avenue

Baltimore, MD 21224

Phone: 410-550-8304

Email: zfu1@jhmi.edu

## Circulation Research

---

**From:** Lakshmi Santhanam <lsantha1@jhmi.edu>  
**Sent:** Wednesday, May 28, 2014 9:39 AM  
**To:** circulation.research@circresearch.com  
**Subject:** CIRCRES/2014/304262D

Hello:

Please use this email as my permission to include my name in the acknowledgement section of CIRCRES/2014/304262D.

Sincerely,

Lakshmi Santhanam, PhD  
Assistant Professor  
Department of Anesthesiology & CCM  
Department of Biomedical Engineering  
Johns Hopkins University SOM  
720 Rutland Ave, Ross 1150  
Baltimore, MD 21205  
e-mail: [lsantha1@jhmi.edu](mailto:lsantha1@jhmi.edu)  
Phone: 443-287-6718 (Office)  
410-502-3731 (Lab)

## Circulation Research

---

**From:** Shawna Lewis <slewis45@jhmi.edu>  
**Sent:** Wednesday, May 28, 2014 9:54 AM  
**To:** circulation.research@circresearch.com  
**Cc:** Lewis Romer  
**Subject:** ms# CIRCRES/2014/304262D

Hi circulation research,

I was mentioned in the acknowledgements on Deepesh Pandey's Reverse Translocation of Arg2 from Mitochondria to Cytosol paper CIRCRES/2014/304262D. I am sending this e-mail to give my permission to be acknowledged.

Thank you,  
Shawna Lewis
